# Supplementary material
Source: Research Square preprint supplement (doi:10.21203/rs.3.rs-9276547/v1)
Supplement: Supplementary file 1 [file 17c6bdf837638c6d833f03c0.docx]

**Appendix 5 : QUESTIONNAIRE/**

THEME : **Contribution of the intake of soft and alcoholic drinks on overweight and obesity among adults in the Health District of Biyem-Assi**

Identification number………………………

Date of collection:

Health Area:

| **No** | **Questions** | **Modalities/ *Modalités*** | |
| --- | --- | --- | --- |
| **Section 1: Sociodemographic characteristics** | | | |
| 1 | Age/ | |  |
| 2 | Sex/ | | 1= Male  2= Female |
| 3 | Education level | | 1= none  2= Primary  3=Secondary  4= higher education |
| 4 | Matrimonial status | | 1= Single  2= Married  3= Widow  4= Divorced |
| 5 | Professional status | | 1= Employed  2= Self-employed  3= Unemployed  4=Student |
| 6 | Religion | | 1= Christian  2= Muslim  3= other |
| 7 | If other, precise | |  |
| **Section 2: Anthropometric data** | | | |
| 1 | Height of the participant (in cm) | |  |
| 2 | Weight of the participant (in kg) | |  |
| 3 | BMI | |  |
| 4 | Waist circumference of the participant (in cm) | |  |
| 5 | Have you been previously diagnosed with obesity by a healthcare provider? | | 1=Yes  2=No |
| **Section 3: General health data** | | | |
| 1 | Are you suffering from any of these diseases? | | 1=High blood pressure  2=Diabetes  3=Chronic renal failure (Chronic Kidney disease)  4=Hypercholesterolemia  5=Obesity |
| 2 | Have you been taking any drugs for any of these disease ? | | 1=Yes  2=No |
| 3 | If yes, please provide the generic name of each drug | |  |
| 4 | Are you currently taking any medications for weight management? | | 1=Yes  2=No |
| **Section 4: Soft drink consumption** | | | |
| 1 | Do you usually consume soft drinks? | | 1=Yes  2=No |
| 2 | Which type of soft drink do you consume? | | 1= Top Brasserie  2= Planet  3= UCB  4=Natural fruit juice  5= Carbonated soft drinks  6= Energy drinks  7= Others |
| 3 | If others, please precise | |  |
| 4 | How often do you consume soft drinks? | | 1= Never or less than 1 time per week  2= 1 time per week  3= 2 times per week  4= 3 times per week  5= 4 time per week  6=5 times per week  7= 6 times per day  8= Everyday (7times per day) |
| 5 | On average, which volume do you consume each time? | | 1=1 glass  2=2 glasses  3=1 bottle  4=2 bottles  5=3 bottles  6=4 bottles/  7=5 or more bottles |
| 6 | Do you consume soft drinks during meals, snacks, or both? | | 1=Meals  2=Snacks  3=Both  4=Others |
| 7 | If other, please precise | |  |
| 8 | Do you choose sugar-free or diet versions of soft drinks? | | 1=Yes  2=No  3=Sometimes |
| **Section 5: Alcohol beverage consumption** | | | |
| 1 | Do you consume alcohol? | | 1=Yes  2=No |
| 2 | Which type of alcohol beverage do you consume*?* | | 1= Craft beer (corn or mil or sorghum)  2= Industrial beer  3= Odontol  4= Industrial or imported wine  5= Palm wine, rafia, arquis, haa  6= Red wine  7= White wine  8= Whisky  9= Others |
| 3 | Please if others, precise | |  |
| 4 | How often do you have a drink containing alcohol? | | 1= Never or less than 1 time per week  2= 1 time per week  3= 2 times per week  4= 3 times per week  5= 4 time per week  6=5 times per week  7= 6 times per day  8= Everyday (7times per day) |
| 5 | How many units of alcohol do you drink on a typical day when you are drinking ? | | 1=1 glass  2=2 glasses  3=1 bottle  4=2 bottles  5=3 bottles  6=4 bottles  7=5 or more bottles |
| 6 | Do you typically consume alcohol in social settings or alone? | | 1= Social  2= Alone  3= Both  4=Other |
| 7 | If other, please precise | |  |
| **Section 6: Soft drink, Alcohol, and Overweight/Obesity** | | | |
| 1 | What is your approximate monthly income? | | 1= Less than 50,000 FCFA  2= 50,000–100,000 FCFA  3= 100,000–250,000 FCFA  4= More than 250,000 FCFA |
| 2 | Do you believe your lifestyle is influenced by your income? | | 1= Yes  2= No  3= Not sure |
| 3 | Active transportation (foot, vehicle) | | 1= Yes  2= No |
| 4 | How often do you purchase soft drinks and alcoholic beverages based on affordability? | | 1= Always  2= Often  3= Sometimes  4= Rarely  5= Never |
| 5 | Do you usually combine soft drinks or alcoholic beverages with high-calorie meals? | | 1= Yes  2= No  3= Sometimes |
| 6 | Are you aware of the calorie content of soft drinks or alcoholic beverages you consume? | | 1= Yes  2= No  3= Sometimes |
| 7 | Do you believe that excessive soft drink or alcohol consumption is linked to obesity? | | 1= Yes  2= No  3= Not sure |
| 8 | Have you received any health advice about limiting the consumption of these beverages? | | 1= Yes  2= No |
| 9 | Would you be willing to reduce your intake of soft drinks or alcohol to manage your weight? | | 1= Yes  2= No  3= Maybe |
